# Supplementary material for: Covalent Inhibitors from Saudi Medicinal Plants Target RNA-Dependent RNA Polymerase (RdRp) of SARS-CoV-2
Source: MDPI journal article supplement (doi:10.3390/v15112175), 2023-10-30
Supplement: s1 [file s1]

**Supplementary Table S1.** Validation of redocking interaction between co-crystal ligand Remdesivir (RTP) with SARS-CoV-2 target protein (RdRp).

| Ligand (RTP) | Receptor (RdRp) |    |          | Interaction Type | Distance (Å) | Energy (kcal/mol) | Docking Score (kcal/mol) |
|--------------|-----------------|----|----------|------------------|--------------|-------------------|--------------------------|
| N5 29        | O4              | U  | 10 (T)   | H-donor          | 2.98         | -3.2              | -8.870                   |
| N4 16        | N3              | U  | 10 (T)   | H-acceptor       | 3.06         | -5.6              |                          |
| O6 19        | O3'             | U  | 20 (P)   | H-acceptor       | 2.91         | -2.9              |                          |
| O1 32        | O3'             | U  | 20 (P)   | H-acceptor       | 3.4          | -0.5              |                          |
| O5 35        | MG              | MG | 1004 (A) | Metal            | 1.93         | -5.2              |                          |
| O5 35        | MG              | MG | 1004 (A) | Ionic            | 1.93         | -17.5             |                          |
| 5-ring       | 6-ring          | U  | 20 (P)   | $\pi$ - $\pi$    | 3.89         | 0                 |                          |
| 6-ring       | 6-ring          | A  | 11 (T)   | $\pi$ - $\pi$    | 3.87         | 0                 |                          |

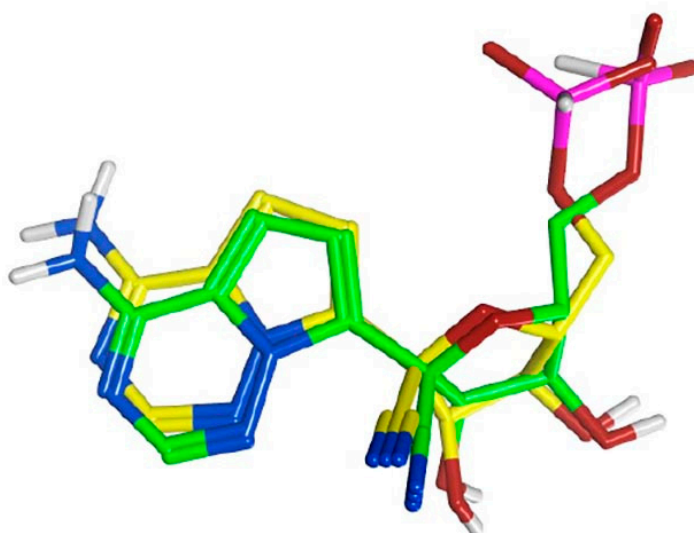

**Supplementary Figure S1.** Validation of docking protocol with RdRp and co-crystal ligand Remdesivir (RTP). Superimposed image after redocking of co-crystallized ligand Remdesivir (RTP) (green) with the crystalized ligand (yellow) RMSD: 0.970 Å.

**Supplementary Table S2.** Non-covalent docking of 5,3',4'-trihydroxyflavan 7-O-gallate (compound 1) with SARS-CoV-2 target protein (RdRp).

| Ligand<br>(Compound 1) | Receptor<br>(RdRp) | Interaction<br>Type | Distance<br>(Å) | Energy<br>(kcal/mol) | Docking<br>Score<br>(kcal/mol) |
|------------------------|--------------------|---------------------|-----------------|----------------------|--------------------------------|
| O 1                    | N7 A 19 (P)        | H-donor             | 2.95            | -3.6                 | -6.8                           |
| O 5                    | OP2 U 18 (P)       | H-donor             | 2.93            | -0.6                 |                                |
| O 31                   | OD1 ASP 623 (A)    | H-donor             | 3.18            | -0.6                 |                                |
| O 37                   | O2 U 20 (P)        | H-donor             | 3.09            | -0.9                 |                                |
| O 41                   | NZ LYS 545 (A)     | H-acceptor          | 3.13            | -0.8                 |                                |
| C 39                   | 6-ring U 20 (P)    | H- $\pi$            | 4.17            | -0.7                 |                                |

**Supplementary Table S3.** Non-covalent docking of 5,4'-dihydroxyflavan 7-3'-O-digallate (compound 2) with SARS-CoV-2 target protein (RdRp).

| Ligand<br>(Compound 2) | Receptor<br>(RdRp) | Interaction<br>Type | Distance<br>(Å) | Energy<br>(kcal/mol) | Docking<br>Score<br>(kcal/mol) |
|------------------------|--------------------|---------------------|-----------------|----------------------|--------------------------------|
| O 13                   | OP2 U 10 (T)       | H-donor             | 2.87            | -4.6                 | -7.7                           |
| O 42                   | O5 POP 1003 (A)    | H-donor             | 2.78            | -5.6                 |                                |
| C 62                   | 6-ring U 20 (P)    | H- $\pi$            | 4.48            | -0.2                 |                                |
| 6-ring                 | CD LYS 545 (A)     | $\pi$ -H            | 4.54            | -0.5                 |                                |
| 6-ring                 | CD ARG 555 (A)     | $\pi$ -H            | 4.13            | -0.2                 |                                |
|                        |                    |                     |                 |                      |                                |

**Supplementary Table S4.** Non-covalent docking of 5,3'-dihydroxyflavan 7-4'-O-digallate (compound 3) with SARS-CoV-2 target protein (RdRp).

| Ligand<br>(Compound 3) | Receptor<br>(RdRp) | Interaction<br>Type | Distance<br>(Å) | Energy<br>(kcal/mol) | Docking<br>Score<br>(kcal/mol) |
|------------------------|--------------------|---------------------|-----------------|----------------------|--------------------------------|
| O 10                   | OP2 U 18 (P)       | H-donor             | 2.81            | -3.6                 | -8.0267                        |
| O 13                   | OP2 U 17 (P)       | H-donor             | 3               | -3.7                 |                                |
| O 60                   | O5 POP 1003 (A)    | H-donor             | 2.91            | -2                   |                                |
| C 30                   | 6-ring U 20 (P)    | H- $\pi$            | 4.43            | -0.2                 |                                |
| 6-ring                 | NZ LYS 545 (A)     | $\pi$ -cation       | 4.28            | -0.2                 |                                |
|                        |                    |                     |                 |                      |                                |

**Supplementary Table S5.** Non-covalent docking of Spinasterol (compound 4) with SARS-CoV-2 target protein (RdRp).

| Ligand<br>(Compound 4) | Receptor<br>(RdRp) | Interaction<br>Type | Distance<br>(Å) | Energy<br>(kcal/mol) | Docking<br>Score<br>(kcal/mol) |
|------------------------|--------------------|---------------------|-----------------|----------------------|--------------------------------|
| O 1                    | OG1 THR 680 (A)    | H-donor             | 3.1             | -0.2                 | -5.0536                        |
| O 1                    | ND2 ASN 691 (A)    | H-acceptor          | 2.94            | -2                   |                                |

**Supplementary Table S6.** Non-covalent docking of Spinasterol (compound 5) with SARS-CoV-2 target protein (RdRp).

| Ligand<br>(Compound 5) | Receptor<br>(RdRp) | Interaction<br>Type | Distance<br>(Å) | Energy<br>(kcal/mol) | Docking<br>Score<br>(kcal/mol) |
|------------------------|--------------------|---------------------|-----------------|----------------------|--------------------------------|
| O 1                    | OG1 THR 680 (A)    | H-donor             | 3.1             | -0.2                 | -4.7243                        |
| O 1                    | ND2 ASN 691 (A)    | H-acceptor          | 2.94            | -2                   |                                |

**Supplementary Table S7.** Non-covalent docking of 3',4',5,7-tetrahydroxy-3-methoxyflavone (compound 6) with SARS-CoV-2 target protein (RdRp).

| Ligand<br>(Compound 6) | Receptor<br>(RdRp) | Interaction<br>Type | Distance<br>(Å) | Energy<br>(kcal/mol) | Docking<br>Score<br>(kcal/mol) |
|------------------------|--------------------|---------------------|-----------------|----------------------|--------------------------------|
| O 19                   | O5 POP 1003 (A)    | H-donor             | 3.17            | -3                   | -6.8664                        |
| O 1                    | N3 U 10 (T)        | H-acceptor          | 3.27            | -1.1                 |                                |
| O 1                    | NZ LYS 545 (A)     | H-acceptor          | 3.49            | -1.1                 |                                |
| O 27                   | N3 U 10 (T)        | H-acceptor          | 3.3             | -0.7                 |                                |
| C 11                   | 6-ring U 20 (P)    | H- $\pi$            | 4.51            | -0.3                 |                                |
| 6-ring                 | C2' U 20 (P)       | $\pi$ -H            | 4.98            | -0.3                 |                                |

**Supplementary Table S8.** Non-covalent docking of Vernolepin (compound 7) with SARS-CoV-2 target protein (RdRp).

| Ligand<br>(Compound 7) | Receptor<br>(RdRp) | Interaction<br>Type | Distance<br>(Å) | Energy<br>(kcal/mol) | Docking<br>Score<br>(kcal/mol) |
|------------------------|--------------------|---------------------|-----------------|----------------------|--------------------------------|
| O 32                   | O5 POP 1003 (A)    | H-donor             | 2.85            | -3.5                 | -5.9227                        |
| O 12                   | N3 U 10 (T)        | H-acceptor          | 2.99            | -4.3                 |                                |
| C 14                   | 6-ring A 11 (T)    | H-pi                | 4.88            | -0.2                 |                                |

**Supplementary Table S9.** Non-covalent docking of Vernadolol (compound **8**) with SARS-CoV-2 target protein (RdRp).

| Ligand<br>(Compound 8) | Receptor<br>(RdRp) | Interaction<br>Type | Distance<br>(Å) | Energy<br>(kcal/mol) | Docking<br>Score<br>(kcal/mol) |
|------------------------|--------------------|---------------------|-----------------|----------------------|--------------------------------|
| O 12                   | SG CYS 622 (A)     | H-donor             | 3.55            | -0.2                 | -6.4809                        |
| O 21                   | O5 POP 1003 (A)    | H-donor             | 2.86            | -3.5                 |                                |
| C 42                   | O2 U 10 (T)        | H-donor             | 3.43            | -0.4                 |                                |
| O 30                   | NZ LYS 545 (A)     | H-acceptor          | 3.2             | -0.2                 |                                |
| O 31                   | NZ LYS 545 (A)     | H-acceptor          | 3.28            | -1.3                 |                                |
| O 48                   | NZ LYS 545 (A)     | H-acceptor          | 2.87            | -2.5                 |                                |
| O 48                   | 6-ring U 20 (P)    | H-pi                | 4.62            | -0.9                 |                                |

**Supplementary Table S10.** Non-covalent docking of 11 $\beta$ ,13-dihydrovernodalin (compound **9**) with SARS-CoV-2 target protein (RdRp).

| Ligand<br>(Compound 9) | Receptor<br>(RdRp) | Interaction<br>Type | Distance<br>(Å) | Energy<br>(kcal/mol) | Docking<br>Score<br>(kcal/mol) |
|------------------------|--------------------|---------------------|-----------------|----------------------|--------------------------------|
| C 11                   | OG SER 682 (A)     | H-donor             | 3.2             | -0.2                 | -6.4809                        |
| C 15                   | OD1 ASP 623 (A)    | H-donor             | 3.3             | -0.5                 |                                |
| C 19                   | O4 U 10 (T)        | H-donor             | 3.33            | -0.3                 |                                |
| C 21                   | OG1 THR 687 (A)    | H-donor             | 3.36            | -0.2                 |                                |
| O 4                    | N3 U 10 (T)        | H-acceptor          | 2.98            | -4.1                 |                                |
| O 5                    | OG1 THR 687 (A)    | H-acceptor          | 2.86            | -0.6                 |                                |
| C 19                   | 6-ring A 11 (T)    | H-pi                | 4.61            | -0.3                 |                                |

**Supplementary Table S11.** Non-covalent docking of Quercitrin 3-O-rhamnoside (compound **10**) with SARS-CoV-2 target protein (RdRp).

| Ligand<br>(Compound 10) | Receptor<br>(RdRp) | Interaction<br>Type | Distance<br>(Å) | Energy<br>(kcal/mol) | Docking<br>Score<br>(kcal/mol) |
|-------------------------|--------------------|---------------------|-----------------|----------------------|--------------------------------|
| O 21                    | OP2 A 19 (P)       | H-donor             | 2.92            | -3.7                 | -8.1866                        |
| O 43                    | O5 POP 1003 (A)    | H-donor             | 3.04            | -1.6                 |                                |
| O 47                    | O5 POP 1003 (A)    | H-donor             | 3.23            | -1.6                 |                                |
| O 51                    | OD1 ASP 623 (A)    | H-donor             | 2.84            | -4.7                 |                                |
| O 47                    | NH1 ARG 553 (A)    | H-acceptor          | 3.17            | -0.4                 |                                |
| O 47                    | NH2 ARG 553 (A)    | H-acceptor          | 2.99            | -1.4                 |                                |
| 6-ring                  | 6-ring U 20 (P)    | pi-pi               | 3.75            | -0.1                 |                                |
